# Supplementary material
Source: PubMed Central journal article supplement (PMC7418654)
Supplement: ehp6943.s001.acco.pdf [file ehp6943.s001.acco.pdf]

**Note to readers with disabilities:** *EHP* strives to ensure that all journal content is accessible to all readers. However, some figures and Supplemental Material published in *EHP* articles may not conform to [508 standards](#) due to the complexity of the information being presented. If you need assistance accessing journal content, please contact [ehp508@niehs.nih.gov](mailto:ehp508@niehs.nih.gov). Our staff will work with you to assess and meet your accessibility needs within 3 working days.

### **Supplemental Material**

#### **Arsenic Metabolism in Mice Carrying a *BORCS7/AS3MT* Locus Humanized by Syntenic Replacement**

Beverly H. Koller, John N. Snouwaert, Christelle Douillet, Leigh A. Jania, Hisham El-Masri, David J. Thomas, and Miroslav Stýblo

#### **Table of Contents**

**Table S1.** Haplotype for selected single nucleotide polymorphisms (SNPs) of human *BORCS7-AS3MT* segment included in the humanized locus of Hs/Hs mice.

**Table S2.** Predesigned primers used in PCR reactions during the assembly of *Borcs5/As3mt* displacer and gene expression analyses.

**Table S3.** The pFloxXerX plasmid used during the assembly of *Borcs5/As3mt* displacer to derive the vector backbone carrying a ColE1 origin of replication and a spectinomycin gene.

**Table S4.** The pSfiI-JT15-neoJTZ17-SfiI vector used during the assembly of *Borcs5/As3mt* displacer as a source of the neomycin resistance gene.

**Figure S1.** Comparison of *AS3MT* and *As3mt* expression levels in adrenals and liver of the humanized (Hs/Hs) and wild type (WT/WT) mice and the WT/Hs heterozygotes: **A.** Relative expression of the human *AS3MT*; **B.** Relative expression of the mouse *As3mt*. 2 µg RNA was reverse transcribed and quantitative PCR was run using *AS3MT* (Hs00960526\_q1), *As3mt* (Mm00491075\_m1), and 18S gene expression assays (Applied Biosystems) and qPCRBIO Probe Blue Mix (low ROX, Genesee Scientific). For each tissue, expression level in the mice homozygous for the gene was assigned a value of 1 (Mean +SE, N=6 for adrenals, N=3 for liver).

**Figure S2.** Expression of *BORCS7-AS3MT* read-through transcripts in tissues of the humanized (Hs/Hs) and wild type (WT/WT) mice and the WT/Hs heterozygotes. **A.** Read-through transcript expression in testes, adrenal glands, and liver of Hs/Hs mice (N=1/tissue). **B.** Separation of cDNA from testes of WT/WT, WT/Hs and Hs/Hs mice on a 1.6% agarose gel (N=1/genotype): (a) 100 bp fragment, consistent with the previously described read-through transcript; (b) 220 bp fragment of a read-through transcript that has not been previously reported. **C.** Schematic structures of the unspliced *BORCS7* isoforms (lavender), *AS3MT* (blue) and the previously reported (orange) (Lu X et al. 2015) and novel (red) *BORCS7-AS3MT* read-through transcripts. Introns are indicated by thin lines, untranslated exonic sequence by medium lines, and exonic coding sequence by thick lines. The position of the stop codon is indicated for the top two *BORCS7* transcripts. The PCR used for quantification and sequencing of the *BORCS7-AS3MT* junction of the read-through transcripts is indicated at the bottom of the figure (green).

**Figure S3.** Concentrations of inorganic arsenic (iAs), methyl-arsenic (MAs) and dimethyl-arsenic (DMAs) ( $\mu\text{g As/L}$ ) in urine of humanized (Hs/Hs) and wild type (WT/WT) male (M) and female (F) mice collected during 24-h intervals after oral administration of a single dose of iAs ( $20 \mu\text{g As/kg}$  body weight). Mean (x), median (—), 25<sup>th</sup> and 75<sup>th</sup> percentiles (box), maximum and minimum (whiskers), and individual values including outliers are shown (N=8 for Hs/Hs males, N=10 for Hs/Hs females, N=7 for WT/WT males, and N=11 for WT/WT females). MAs concentration was below limit of detection in 52 out of 54 urine samples collected from WT/WT mice during the 3 collection intervals; a value of  $0 \mu\text{g As/L}$  was imputed for MAs concentrations in these samples. <sup>a,b,c</sup> Within each panel, statistically significant differences between strains and sexes are marked with different letters. (ANOVA with Student-Newman-Keuls post-test.).

**Figure S4.** Proportions of total arsenic (%tAs) represented by inorganic arsenic (%iAs), methyl-arsenic (%MAs) and dimethyl-arsenic (%DMAs) in urine of humanized (Hs/Hs) and wild type (WT/WT) male (M) and female (F) mice collected during 24-h intervals after oral administration of a single dose of iAs ( $20 \mu\text{g As/kg}$  body weight). Mean +SD (N=8 for Hs/Hs males, N=10 for Hs/Hs females, N=7 for WT/WT males, and N=11 for WT/WT females). MAs concentration was below limit of detection in 52 out of 54 urine samples collected from WT/WT mice during the 3 collection intervals; a value of  $0 \mu\text{g As/L}$  was imputed for MAs. Within each panel, statistically significant differences between strains and sexes are marked with different letters: <sup>a,b,c</sup> for differences in %iAs, <sup>d,e,f</sup> for differences in %MAs, g,hi for differences in %DMAs. (ANOVA with Student-Newman-Keuls post-test.).

**Figure S5.** Concentrations of inorganic arsenic (iAs), methyl-arsenic (MAs) and dimethyl-arsenic (DMAs) ( $\mu\text{g As/L}$ ) in feces of humanized (Hs/Hs) and wild type (WT/WT) male (M) and female (F) mice collected during 24-h intervals after oral administration of a single dose of iAs ( $20 \mu\text{g As/kg}$  body weight). Mean (x), median (—), 25<sup>th</sup> and 75<sup>th</sup> percentiles (box), maximum and minimum (whiskers), and individual values including outliers are shown (N=8 for Hs/Hs males, N=10 for Hs/Hs females, N=7 for WT/WT males, and N=11 for WT/WT females). DMAs concentration was below limit of detection in 48 out of 54 fecal samples collected during the 3 collection intervals from male and female Hs/Hs mice; a value of  $0 \mu\text{g As/kg}$  was imputed for DMAs concentrations in these samples. <sup>a,b</sup> Within each panel, statistically significant differences between strains and sexes are marked with different letters. (ANOVA with Student-Newman-Keuls post-test.).

**Figure S6.** Proportions of total arsenic (%tAs) represented by inorganic arsenic (%iAs), methyl-arsenic (%MAs) and dimethyl-arsenic (%DMAs) in feces of humanized (Hs/Hs) and wild type (WT/WT) male (M) and female (F) mice collected during 24-h intervals after oral administration of a single dose of iAs (20  $\mu\text{g}$  As/kg body weight). Mean +SD (N=8 for Hs/Hs males, N=10 for Hs/Hs females, N=7 for WT/WT males, and N=11 for WT/WT females). DMAs concentration was below limit of detection in 48 out of 54 fecal samples collected during the 3 collection intervals from male and female Hs/Hs mice; a value of 0  $\mu\text{g}$  As/kg was imputed for DMAs concentrations in these samples. Within each panel, statistically significant differences between strains and sexes are marked with different letters: <sup>a,b,c</sup> for differences in %iAs, <sup>d,e,f,g</sup> for differences in %MAs, <sup>h,i,j</sup> for differences in %DMAs. (ANOVA with Student-Newman-Keuls post-test.).

**Figure S7.** Proportions of total arsenic (%tAs) represented by inorganic arsenic (%iAs), methyl-arsenic (%MAs) and dimethyl-arsenic (%DMAs) in urine of humanized (Hs/Hs) and wild type (WT/WT) male (M) and female (F) mice collected during 4-week exposure to iAs in drinking water (400  $\mu\text{g}$  As/L). Mean +SD (N=8 for Hs/Hs males, N=10 for Hs/Hs females, N=7 for WT/WT males, and N=11 for WT/WT females). MAs concentration was below LOD in 70 out of 72 urine samples collected from WT/WT mice during the 4 collection intervals; a value of 0  $\mu\text{g}$  As/L was imputed for MAs concentrations in these samples. Within each panel, statistically significant differences between strains and sexes are marked with different letters: <sup>a,b,c</sup> %iAs, <sup>d,e,f</sup> %MAs, <sup>g,h</sup> %DMAs. (ANOVA with Student-Newman-Keuls post-test.).

**Figure S8.** Concentrations of total arsenic ( $\mu\text{g}$  As/kg) in livers and kidneys of humanized (Hs/Hs) and wild type (WT/WT) male (M) and female (F) mice after 4-week exposure to iAs in drinking water (400  $\mu\text{g}$  As/L). Total arsenic was calculated as sum of inorganic arsenic, methyl-arsenic and dimethyl-arsenic. Mean ( $\bar{x}$ ), median (—), 25<sup>th</sup> and 75<sup>th</sup> percentiles (box), maximum and minimum (whiskers), and individual values including outliers are shown (Mean+SD; N=8 for Hs/Hs males, N=10 for Hs/Hs females, N=7 for WT/WT males, and N=11 for WT/WT females). DMAs was below LOD in 16 out of 18 liver samples collected from Hs/Hs mice; a value of 0  $\mu\text{g}$  As/kg was imputed for DMAs concentrations in these samples. <sup>a,b,c</sup> Within each panel, statistically significant differences between strains and sexes are marked with different letters. (ANOVA with Student-Newman-Keuls post-test.).

## References

**Table S1:** Haplotype for selected single nucleotide polymorphisms (SNPs) of human *BORCS7-AS3MT* segment included in the humanized locus of Hs/Hs mice

**A. AS3MT SNPs previously associated with iAs metabolism**

| SNP        | Allele | Frequency | AA  |
|------------|--------|-----------|-----|
| rs3740393  | G      | 78.97%    | -   |
| rs3740390  | C      | 84.29%    | -   |
| rs11191439 | T      | 90.72%    | Met |
| rs10748835 | G      | 55.87%    | -   |

**B. GWAS schizophrenia-associated top eQTL (expression quantitative trait loci)**

| Gene   | Top eQTL   | Allele | Frequency |
|--------|------------|--------|-----------|
| AS3MT  | rs7085104  | A      | 61.86%    |
| BORCS7 | rs11441374 | -      | 82.33%    |

**C. AS3MT VNTR**

| SNP        | Allele   | Frequency |
|------------|----------|-----------|
| rs45567337 | 3 copies | 59.17%    |

The segment of DNA used to generate the humanized locus was derived from the tilepath bacterial artificial chromosome (BAC) encompassing the genes encoding for BLOC-1 Related Complex Subunit 7 (*BORCS7*) and arsenic (+3 oxidation state) methyltransferase (*AS3MT*), and therefore the sequence of the humanized locus matches the human reference allele (GRCh38/hg38 assembly). **A.** Haplotype based on SNPs previously reported to be associated with altered metabolism of inorganic arsenic (iAs). The haplotype carried by the reference allele corresponds to the previously described GCTG haplotype (Aptata et al. 2017). **B.** Haplotype for SNPs carried by the humanized locus that have previously been associated with schizophrenia (Li et al. 2016). **C.** Haplotype for variable number tandem repeat (VNTR) in the *AS3MT* gene that has previously been associated with risk of schizophrenia (Li et al. 2016).

**Table S2:** Predesigned primers used in PCR reactions during the assembly of *Borcs5/As3mt* displacer and gene expression analyses

| Primer #  | Sequence                                                                      |
|-----------|-------------------------------------------------------------------------------|
| 215317    | TTCTCTGTCCTTCTGTGCGACGGTTACGCCGCTCCATGAGCTTATCGCGACGCGTAAAGCTAGCCTGCCTCAAAAC  |
| 213218    | TATTATGAACCCCATGGGCCAAGAGGACAAAACTGCTGAGTGATTTTCTAAGCACTGTGGGCTAGGGTCTTGACTCG |
| 215319    | TAAAGCTAGCCTGCCTCAAAAC                                                        |
| 215320    | CAGCGGTACGCCCATGGGGCGGTACGGGAGGAGGAGAACTAGC                                   |
| 215323    | ATGGCCCTTTCGTCTTCTAGACCAGCCAGGACAGAAATG                                       |
| 215324    | GGAAGGCAAGCAGTCTTCGGCCGCGTATTGGGCGCTCTTC                                      |
| 215325    | ATACGCGCCGAAGACTGCTTGCCTTCTGTGGGATTGT                                         |
| 215326    | GAGAGAGAAGACCGCGGCCGCGTGGCCCCAGCTCTGGCTCGAACT                                 |
| 215330    | AAATTGTAAGCGACGCGTTTTGGGCACTAGAGGAAGAGGTGA                                    |
| 215332    | GGCTGGTCTAGGAAGACGAAAGGGCCATCTGCGCTCAGG                                       |
| 215336    | CGCGGTACGCCAGGCTGGCTGCTATCCGTGCAGAAGCCCTTGTA                                  |
| 215337    | CACCACCCATGTGGTTCATCATCTCA                                                    |
| 215338    | TTGTAAGCGACGCGTCCCAAAGTAGACCTCTGACCAGA                                        |
| 215339    | CTACTTTGGGCACGCGTCGCTTACAATTTAGGTGGCACTTT                                     |
| 56719     | CTTTGGCCGCCGCCAGTCCCTGCTCGCTTCGCTACTTGGAGCCACTATCGATGATCTTTCTACGGGGTCTGACG    |
| ScreenF   | ATGCCCATGCTCTTCTCTTATGCT                                                      |
| 176268    | AAATTAAGGGCCAGCTCATTCTC                                                       |
| common    | TTTACCCCAATTTCACTATGAAG                                                       |
| displaced | GCTCCATCTGCTAAATCTACATCC                                                      |
| endo      | TGGGAGAATTATTGATTGACATC                                                       |
| d2d3-F    | GCCGAGGAGACAATATTATGGCT                                                       |
| d2d3-R    | TGGTCATGTCTATTCCAGTCACGT                                                      |
| full-F    | CGAGGAGACATGGCTGCAC                                                           |
| full-R    | GTGGTGACACAGCCGTTGG                                                           |

**Table S3:** The pFloxxerX plasmid used during the assembly of *Borcs5/As3mt* displacer to derive the vector backbone carrying a ColE1 origin of replication and a spectinomycin gene.

| LOCUS        | FloxxerX                                                                                 | 2744 bp | DNA | circular |
|--------------|------------------------------------------------------------------------------------------|---------|-----|----------|
| 10-JUN-2020  |                                                                                          |         |     |          |
| FEATURES     | Location/Qualifiers                                                                      |         |     |          |
| insert       | 2351..2744<br>/source="Floxxer3 segmented"<br>/type="Custom cloned insert"               |         |     |          |
| insert       | complement(2351..2744)<br>/source="pShuffler-lacZ"<br>/type="Custom cloned insert"       |         |     |          |
| misc_feature | 2549..2744<br>/note="lacZ alpha PCR"                                                     |         |     |          |
| misc_feature | 2544..2744<br>/dnas_title="lacZ"<br>/note="lacZ"                                         |         |     |          |
| misc_feature | complement(2582..2598)<br>/note="m13 -20"                                                |         |     |          |
| misc_feature | 2580..2738<br>/note="lacZ aa 6-58"                                                       |         |     |          |
| PCR_primer   | 2549..2572<br>/pair=""<br>/primer="TTCGCCCTATAGTGAGTCGTATTA"<br>/current=0               |         |     |          |
| misc_feature | 2527..2572<br>/note="lacZ alpha upper"                                                   |         |     |          |
| misc_feature | 2416..2537<br>/note="lacZpro"                                                            |         |     |          |
| PCR_primer   | complement(2504..2526)<br>/pair=""<br>/primer="GTGTGAAATTGTTATCCGCTCAC"<br>/current=0    |         |     |          |
| misc_feature | complement(2504..2548)<br>/note="lacZ pro lower"                                         |         |     |          |
| misc_feature | 2351..2526<br>/note="lacZ promoter PCR"                                                  |         |     |          |
| misc_feature | 2351..2371<br>/dnas_title="lacZ pro upper"<br>/note="lacZ pro upper"                     |         |     |          |
| PCR_primer   | 2351..2371<br>/pair=""<br>/primer="GCGCGTTGGCCGATTCATTA"<br>/current=0                   |         |     |          |
| misc_feature | 2334..2371<br>/dnas_title="#14 lacZ upper"<br>/note="lacZ upper"                         |         |     |          |
| insert       | complement(2351..2744)<br>/source="Floxxer5 segmented"<br>/type="Custom cloned insert"   |         |     |          |
| insert       | join(273..273,288..1161)<br>/source="Floxxer3 segmented"<br>/type="Custom cloned insert" |         |     |          |

```

insert      complement(288..1161)
            /source="Floxxer3 segmented"
            /type="Custom cloned insert"
misc_feature complement(455..1098)
            /note="colE1"
misc_feature 294..1161
            /note="Floxxer backbone"
misc_feature 1086..1109
            /note="56719/56201"
misc_feature complement(1091..1113)
            /note="132355"
misc_feature 1086..1161
            /note="Red/ET amp PCR"
misc_feature complement(1099..1161)
            /note="TN3"
PCR_primer  complement(1138..1161)
            /pair=""
            /primer="TTTGATAATCTCATGACCAAATC"
            /current=0
insert      288..1161
            /source="pCRISPFloxxer"
            /type="Custom cloned insert"
misc_feature complement(288..1161)
            /note="Floxxer ori PCR"
misc_feature complement(1138..1161)
            /note="#09 colE1 upper"
misc_feature 273..309
            /dnas_title="#15 colE1 lower"
            /note="colE1 lower"
PCR_primer  288..309
            /pair=""
            /primer="GGCCGCGTATTGGGCGCTCTTC"
            /current=0
insert      2334..2350
            /source="Floxxer5 segmented"
            /type="Custom cloned insert"
insert      274..287
            /source="Floxxer3 segmented"
            /type="Custom cloned insert"
insert      1..272
            /source="FloxxerX"
            /type="Custom cloned insert"
PCR_primer  complement(243..272)
            /pair=""
            /primer="AAAGGGCGAAAAACCGTCTATCAG"
            /current=0
misc_feature complement(243..272)
            /note="lacZ alpha lower"
insert      complement(1..272)
            /source="pShuffler-lacZ"

```

```

misc_feature      /type="Custom cloned insert"
1..272
misc_feature      /note="lacZ alpha PCR"
1..213
misc_feature      /dnas_title="lacZ"
insert            /note="lacZ"
                  join(1..1,1..270)
misc_feature      /dnas_title="Floxxer3 segmented"
                  /source="Floxxer3 segmented"
insert            complement(243..272)
misc_feature      /note="#05 lacZ lower"
insert            complement(join(0..270,3..272))
                  /dnas_title="Floxxer5 segmented"
                  /source="Floxxer5 segmented"
insert            join(1..1,1..1,1..270)
                  /dnas_title="Floxxer3 segmented"
                  /source="Floxxer3 segmented"
insert            1162..2333
                  /source="FloxxerX"
insert            /type="Custom cloned insert"
                  1166..2333
                  /source="spectinomycin PCR"
misc_feature      /type="Custom cloned insert"
                  complement(1184..2194)
misc_feature      /note="spectinomycin resistance"
                  complement(1184..2328)
PCR_primer        /note="spectinomycin cassette"
                  1166..1188
                  /pair=""
                  /primer="TCATGGGTGGCTCGAGGGTTATT"
                  /current=0
insert            complement(1166..2333)
                  /source="pDONR223-MCU-D261A rezero"
misc_feature      /type="Custom cloned insert"
                  complement(1166..2333)
misc_feature      /note="spectinomycin PCR"
                  1166..1188
                  /note="spec lower"
PCR_primer        complement(2311..2333)
                  /pair=""
                  /primer="CTAGACCAGCCAGGACAGAAATG"
                  /current=0
misc_feature      1162..1188
                  /note="#08 Spec lower"
misc_feature      complement(2311..2333)
                  /note="#03 spec upper"
PCR_primer        278..299
                  /pair=""
                  /primer="CACCTTGCCGCGCGTATTG"
                  /current=0

```



```

misc_feature 278..2347
              /note="vector PCR"
PCR_primer   complement(2326..2347)
              /pair=""
              /primer="CACTGGGGCCGGGCCTAGACCA"
              /current=0
misc_feature 2284..2307
              /note="FloxxerX seq F"
misc_feature complement(320..343)
              /note="FloxxerX seq R"
PCR_primer   1184..1207
              /pair=""
              /primer="TTATTTGCCGACTACCTTGGTGAT"
              /current=0
PCR_primer   complement(2172..2194)
              /pair=""
              /primer="ATGCGCTCACGCAACTGGTCCAG"
              /current=0
misc_feature complement(1184..2194)
              /note="spec CDS PCR"
PCR_primer   404..425
              /pair=""
              /primer="TCAGGGGATAACGCAGGAAAGA"
              /current=1
misc_feature 404..425
              /note="shorter vector PCR F"
source       1..2744
              /dnas_title="FloxxerX"

```

ORIGIN

```

1 CCCTGTAGCG GCGCATTAAAG CGCGCGGGT GTGGTGTTA CGCGCAGCGT
GACCGCTACA
61 CTTGCCAGCG CCCTAGCGCC CGCTCCTTTC GCTTCTTCC CTTCTTTCT
CGCCACGTTT
121 GCCGGCTTTC CCCGTCAAGC TCTAAATCGG GGGCTCCCTT TAGGGTTCCG
ATTTAGTGCT
181 TTACGGCACC TCGACCCCAA AAAACTTGAT TAGGGTGATG GTTCACGTAG
TGGGCCATCG
241 CCCTGATAGA CGGTTTTTCG CCCTTgaat tcgcgggccac cttggccggc
cgcGTATTGG
301 GCGCTCTTCC GCTTCTCGC TCACTGACTC GCTGCGCTCG GTCGTTCGGC
TGCGGCGAGC
361 GGTATCAGCT CACTCAAAGG CGTAATACG GTTATCCACA GAATCAGGGG
ATAACGCAGG
421 AAAGAACATG TGAGCAAAG GCCAGCAAAA GGCCAGGAAC CGTAAAAAGG
CCGCGTTGCT
481 GCGTTTTTC CATAGGCTCC GCCCCCTGA CGAGCATCAC AAAAATCGAC
GCTCAAGTCA
541 GAGGTGGCGA AACCCGACAG GACTATAAAG ATACCAGGCG TTTCCCCTG
GAAGTCCCT
601 CGTGCGCTCT CCTGTTCCGA CCCTGCCGCT TACCGGATAC CTGTCCGCT

```

TTCTCCCTTC  
661 GGGAAAGCGTG GCGCTTTCTC ATAGCTCACG CTGTAGGTAT CTCAGTTCGG  
TG TAGGTCGT  
721 TCGCTCCAAG CTGGGCTGTG TGCACGAACC CCCC GTTCAG CCCGACCGCT  
GCGCCTTATC  
781 CGGTA ACTAT CGTCTTGAGT CCAACCCGGT AAGACACGAC TTATCGCCAC  
TGGCAGCAGC  
841 CACTGGTAAC AGGATTAGCA GAGCGAGGTA TG TAGGCGGT GCTACAGAGT  
TCTTGAAGTG  
901 GTGGCCTAAC TACGGCTACA CTAGAAGAAC AGTATTTGGT ATCTGCGCTC  
TGCTGAAGCC  
961 AGTTACCTTC GGAAAAAGAG TTGGTAGCTC TTGATCCGGC AAACAAACCA  
CCGCTGGTAG  
1021 CGGTGGTTTT TTTGTTTGCA AGCAGCAGAT TACGCGCAGA AAAAAAGGAT  
CTCAAGAAGA  
1081 TCCTTTGATC TTTTCTACGG GGTCTGACGC TCAGTGAAC GAAAACTCAC  
GTTAAGGAT  
1141 TTTGGTCATG AGATTATCAA AagtTCATG GGTGGCTCGA GGGTTATTTG  
CCGACTACCT  
1201 TGGTGATCTC GCCTTTCACG TAGTGGACAA ATTCTTCAA CTGATCTGCG  
CGCGAGGCCA  
1261 AGCGATCTTC TTCTGTCCA AGATAAGCCT GTCTAGCTTC AAGTATGACG  
GGCTGATACT  
1321 GGGCCGGCAG GCGCTCCATT GCCCAGTCGG CAGCGACATC CTTCGGCGCG  
ATTTTGCCGG  
1381 TTA CTGCGCT GTACCAAATG CGGGACAACG TAAGCACTAC ATTTGCTCA  
TCGCCAGCCC  
1441 AGTCGGGCGG CGAGTTCCAT AGCGTAAAGG TTTCA TTTAG CGCCTCAAAT  
AGATCCTGTT  
1501 CAGGAACCGG ATCAAAGAGT TCCTCCGCCG CTGGACCTAC CAAGCAACG  
CTATGTTCTC  
1561 TTGCTTTTGT CAGCAAGATA GCCAGATCAA TGTCGATCGT GGCTGGCTCG  
AAGATACCTG  
1621 CAAGAATGTC ATTGCGCTGC CATTCTCAA ATTGCAGTTC GCGCTTAGCT  
GGATAACGCC  
1681 ACGGAATGAT GTCGTCTGTC ACAACAATGG TGACTTCTAC AGCGGGGAGA  
ATCTCGCTCT  
1741 CTCCAGGGGA AGCCGAAGTT TCCAAAAGGT CGTTGATCAA AGCTCGCCG  
GTTGTTTCAT  
1801 CAAGCCTTAC GGTCACCGTA ACCAGCAAAT CAATATCACT GTGTGGCTTC  
AGGCCGCCAT  
1861 CCACTGCGGA GCCGTACAAA TGTACGGCCA GCAACGTCGG TTCGAGATGG  
CGCTCGATGA  
1921 CGCCA ACTAC CTCTGATAGT TGAGTCGATA CTTCGGCGAT CACCGTTCC  
CTCATGATGT  
1981 TTA ACTTTGT TTTAGGGCGA CTGCCCTGCT GCGTAACATC GTTGCTGCTC  
CATAACATCA  
2041 AACATCGACC CACGGCGTAA CGCGCTTGCT GCTTGGATGC CCGAGGCATA  
GACTGTACCC  
2101 CAAAAAACA GTCATAACAA GCCATGAAAA CCGCCACTGC GCCGTTACCA

CCGCTGCGTT  
2161 CGGTCAAGGT TCTGGACCAG TTGCGTGAGC GCATACGCTA CTTGCATTAC  
AGCTTACGAA  
2221 CCGAACAGGC TTATGTCCAC TGGGTTTCGTG CCTTCATCCG TTTCCACGGT  
GTGCGTCACC  
2281 CGGCAACCTT GGGCAGCAGC GAAGTCGAGG CATTCTGTGTC CTGGCTGGTC  
TAGgcccggc  
2341 cccagtggcc GCGCGTTGGC CGATTCATTA ATGCAGCTGG CACGACAGGT  
TTCCCGACTG  
2401 GAAAGCGGGC AGTGAGCGCA ACGCAATTA TGTGAGTTAG CTCACTCATT  
AGGCACCCCA  
2461 GGCTTTACAC TTTATGCTTC CGGCTCGTAT GTTGTGTGGA ATTGTGAGCG  
GATAACAATT  
2521 TCACACAGGA AACAGCTCCT AGGATGAATT CGCCCTATAG TGAGTCGTAT  
TACGCGCGCT  
2581 CACTGGCCGT CGTTTTACAA CGTCGTGACT GGGAAAACCC TGGCGTTACC  
CAACTTAATC  
2641 GCCTTGACG ACATCCCCT TTCGCCAGCT GGCCTAATAG CGAAGAGGCC  
CGCACCGATC  
2701 GCCCTTCCA ACAGTTGCGC AGCCTGAATG GCGAATGGGA CGCG  
//

**Table S4:** The pSfiI-JT15-neoJTZ17-SfiI vector used during the assembly of *Borcs5/As3mt* displacer as a source of the neomycin resistance gene.

```

LOCUS       pSfiI-JT15-neo-J             4880 bp    DNA    circular
10-JUN-2020
Created: Monday, May 30, 2011 4:40 PM
FEATURES             Location/Qualifiers
     misc_feature    764..2296
                     /note="pgk-k/n"
     misc_feature    complement(699..732)
                     /note="loxP JT15 (LE1)"
     misc_feature    complement(2624..2657)
                     /note="loxP JTZ17 (RE1)"
     misc_feature    600..616
                     /note="m13F"
     misc_feature    complement(2727..2745)
                     /note="m13R"
     misc_feature    1343..2146
                     /note="CDS"
     misc_feature    1343..2146
     misc_feature    764..1262
                     /note="pgk-pro"
     PCR_primer     1475..1497
                     /pair=""
                     /primer="CAGGGGCGCCCGTTCTTTTGT"
                     /current=0
     PCR_primer     complement(1964..1987)
                     /pair=""
                     /primer="CAGCCGGCCACAGTCGATGAATCC"
                     /current=1
     misc_feature    1475..1987
                     /note="new neo probe 2012"
     misc_feature    2549..2572
                     /note="176267"
     misc_feature    2455..2482
                     /note="51657"
     misc_feature    2316..2338
                     /note="gpra"
     misc_feature    2403..2426
                     /note="176268"
     misc_feature    2593..2615
                     /note="176266"
     misc_feature    2316..2338
                     /note="big sham lower"
     PCR_primer     2459..2482
                     /pair=""
                     /primer="GTGGGATCATTGTTTTCTCTTGA"
                     /current=0
     misc_feature    2297..2615
                     /note="pgk-pA"
     source         1..4880
                     /dnas_title="pSfiI-JT15-neo-JTZ17-SfiI"
ORIGIN

```

1 CTAATTGTA AGCGTTAATA TTTTGTAAA ATTCGCGTTA AATTTTTGTT  
AAATCAGCTC  
61 ATTTTTTAAC CAATAGGCCG AAATCGGCAA AATCCCTTAT AAATCAAAG  
AATAGACCGA  
121 GATAGGGTTG AGTGTGTTC CAGTTTGAA CAAGAGTCCA CTATTAAGA  
ACGTGGACTC  
181 CAACGTCAA GGGCGAAAA CCGTCTATCA GGGCGATGGC CCACTACGTG  
AACCATCACC  
241 CTAATCAAGT TTTTGGGGT CGAGGTGCCG TAAAGCACTA AATCGGAACC  
CTAAAGGGAG  
301 CCCCCGATT AGAGCTTGAC GGGGAAAGCC GGCGAACGTG GCGAGAAAGG  
AAGGGAAGAA  
361 AGCGAAAGGA GCGGGCGCTA GGGCGCTGGC AAGTGTAGCG GTCACGCTGC  
GCGTAACCAC  
421 CACACCCGCC GCGCTTAATG CGCCGCTACA GGGCGCGTCC CATTGCCAT  
TCAGGCTGCG  
481 CAACTGTTGG GAAGGGCGAT CGGTGCGGGC CTCTTCGCTA TTACGCCAGC  
TGGCGAAAGG  
541 GGGATGTGCT GCAAGGCGAT TAAGTTGGT AACGCCAGGG TTTTCCCAGT  
CACGACGTTG  
601 TAAAACGACG GCCAGTGAGC GCGCGTAATA CGACTCACTA TAGGGCGAAT  
TGGGTACCGG  
661 GCCCCCCTC GAGCAATTGG CCGGCCCGGC CGAATTGGAA TTATTCGTAT  
AGCATACATT  
721 ATACGAAGTT ATCTAGAGCT CGCGGTGGCG GCCCTGCAG GTCCTACCGG  
GTAGGGGAGG  
781 CCCTTTTCCC AAGGCAGTCT GGAGCATGCG CTTTAGCAGC CCCGCTGGCA  
CTTGGCGCTA  
841 CACAAGTGGC CTCTGGCCTC GCACACATTC CACATCCACC GGTAGCGCCA  
ACCGGCTCCG  
901 TTCTTTGGTG GCCCCTTCGC GCCACTTCTA CTCCTCCCCT AGTCAGGAAG  
TTTCCCCAG  
961 CAAGCTCGCG TCGTGCAGGA CGTGACAAAT GGAAGTAGCA CTGCTCACTA  
GTCTCGTGCA  
1021 GATGGACAGC ACCGCTGAGC AATGGAAGCG GGTAGGCCTT TGGGGCAGCG  
GCCAATAGCA  
1081 GCTTTGTTCC TTCGCTTTCT GGGCTCAGAG GCTGGGAAGG GGTGGGTCCG  
GGGGCGGGCT  
1141 CAGGGCGGG CTCAGGGGCG GCGGGCGCC CGAAGGTCCT CCCGAGGCC  
GGCATTCTGC  
1201 ACGCTTCAA AGCGCACGTC TGCCGCGCTG TTCTCCTCTT CCTCATCTCC  
GGGCCTTTCCG  
1261 ACCTGCAGCA GCACGTGTTG ACAATTAATC ATCGGCATAG TATATCGGCA  
TAGTATAATA  
1321 CGACAAGGTG AGGAACTAAA CCATGGGATC GGCCATTGAA CAAGATGGAT  
TGCACGCAGG  
1381 TTCTCCGGCC GCTTGGGTGG AGAGGCTATT CGGCTATGAC TGGGCACAAC  
AGACGATCCG  
1441 CTGCTCTGAT GCCCGCTGT TCCGGCTGTC AGCGCAGGGG CGCCCGTTCC  
TTTTGTCAA

1501 GACCGACCTG TCCGGTGCCC TGAATGAACT GCAGGACGAG GCAGCGCGGC  
TATCGTGGCT  
1561 GGCCACGACG GGC GTTCCTT GCGCAGCTGT GCTCGACGTT GCTACTGAAG  
CGGGAAGGGA  
1621 CTGGCTGCTA TTGGGCGAAG TGCCGGGGCA GGATCTCCTG TCATCTCACC  
TTGCTCCTGC  
1681 CGAGAAAGTA TCCATCATGG CTGATGCAAT GCGGCGGCTG CATACTCTTG  
ATCCGGCTAC  
1741 CTGCCATTG GACCACCAAG CGAAACATCG CATCGAGCGA GCACGTACTC  
GGATGGAAGC  
1801 CGGTCTTGTC GATCAGGATG ATCTGGACGA AGAGCATCAG GGGCTCGCGC  
CAGCCGAACT  
1861 GTTCGCCAGG CTCAAGGCGC GCATGCCCGA CGGCGAGGAT CTCGTCGTGA  
CCCATGGCGA  
1921 TGCCTGCTTG CCGAATATCA TGGTGGAAAA TGGCCGCTTT TCTGGATTCA  
TCGACTGTGG  
1981 CCGGCTGGGT GTGGCGGACC GCTATCAGGA CATAGCGTTG GCTACCCGTG  
ATATTGCTGA  
2041 AGAGCTTGGC GGCGAATGGG CTGACCGCTT CCTCGTGCTT TACGGTATCG  
CCGCTCCCGA  
2101 TTCGCAGCGC ATCGCCTTCT ATCGCCTTCT TGACGAGTTC TTCTGAGGGG  
ATCCGCTGTA  
2161 AGTCTGCAGA AATTGATGAT CTATTAACA ATAAAGATGT CCACTAAAAT  
GGAAGTTTTT  
2221 CCTGTCATAC TTTGTTAAGA AGGGTGAGAA CAGAGTACCT ACATTTTGAA  
TGAAGGATT  
2281 GGAGCTACGG GGGTGGGGT GGGGTGGGAT TAGATAAATG CCTGCTCTTT  
ACTGAAGGCT  
2341 CTTTACTATT GCTTTATGAT AATGTTTCAT AGTTGGATAT CATAATTTAA  
ACAAGCAAAA  
2401 CCAAATTAAG GGCCAGCTCA TTCCTCCCAC TCATGATCTA TAGATCTATA  
GATCTCTCGT  
2461 GGGATCATTG TTTTCTCTT GATTCCCACT TTGTGGTTCT AAGTACTGTG  
GTTTCAAAT  
2521 GTGTCAGTTT CATAGCCTGA AGAACGAGAT CAGCAGCCTC TGTTCCACAT  
ACACTTCATT  
2581 CTCAGTATTG TTTTGCCAAG TTCTAATTCC ATCAGAAGCT TgcATAAATT  
CGTATAGCAT  
2641 ACATTATAGC AATTTATGGG CCCATGGGGC CGCTAGCTCC AGCTTTTGTT  
CCCTTTAGTG  
2701 AGGGTTAATT GCGCGCTTGG CGTAATCATG GTCATAGCTG TTTCTGTGT  
GAAATTGTTA  
2761 TCCGCTCACA ATTCCACACA ACATACGAGC CGGAAGCATA AAGTGTAAG  
CCTGGGGTGC  
2821 CTAATGAGTG AGCTAACTCA CATTAAATTGC GTTGCCTCA CTGCCCGCTT  
TCCAGTCGGG  
2881 AAACCTGTCG TGCCAGCTGC ATTAATGAAT CGGCCAACGC GCGGGGAGAG  
GCGGTTTGCG  
2941 TATTGGGCGC TCTCCGCTT CCTCGCTCAC TGA CTGCTG CGCTCGGTCG  
TTCGGCTGCG

3001 GCGAGCGGTA TCAGCTCACT CAAAGGCGGT AATACGGTTA TCCACAGAAT  
CAGGGGATAA  
3061 CGCAGGAAAG AACATGTGAG CAAAAGGCCA GCAAAAAGGCC AGGAACCGTA  
AAAAGGCCGC  
3121 GTTGCTGGCG TTTTCCATA GGCTCCGCC CCCTGACGAG CATCACAAAA  
ATCGACGCTC  
3181 AAGTCAGAGG TGGCGAAACC CGACAGGACT ATAAAGATAC CAGGCGTTTC  
CCCCTGGAAG  
3241 CTCCTCGTG CGCTCTCCTG TTCCGACCCT GCCGCTTACC GGATACCTGT  
CCGCCTTTCT  
3301 CCCTTCGGGA AGCGTGGCG TTTCTCATAG CTCACGCTGT AGGTATCTCA  
GTTTCGGTGT  
3361 GGTGCTTCGC TCCAAGCTGG GCTGTGTGCA CGAACCCCC GTTCAGCCCC  
ACCGCTGCGC  
3421 CTTATCCGGT AACTATCGTC TTGAGTCCAA CCCGTAAGA CACGACTTAT  
CGCCACTGGC  
3481 AGCAGCCACT GGTAACAGGA TTAGCAGAGC GAGGTATGTA GGCGGTGCTA  
CAGAGTTCTT  
3541 GAAGTGGTGG CCTAACTACG GCTACACTAG AAGGACAGTA TTTGGTATCT  
GCGCTCTGCT  
3601 GAAGCCAGTT ACCTTCGAA AAAGAGTTGG TAGCTCTTGA TCCGGCAAAC  
AAACCACCGC  
3661 TGGTAGCGGT GGTTTTTTTG TTTGCAAGCA GCAGATTACG CGCAGAAAAA  
AAGGATCTCA  
3721 AGAAGATCCT TTGATCTTTT CTACGGGTC TGACGCTCAG TGAACGAAA  
ACTCACGTTA  
3781 AGGGATTTTG GTCATGAGAT TATCAAAAAG GATCTTCACC TAGATCCTTT  
TAAATTAATA  
3841 ATGAAGTTTT AAATCAATCT AAAGTATATA TGAGTAAACT TGGTCTGACA  
GTTACCAATG  
3901 CTTAATCAGT GAGGCACCTA TCTCAGCGAT CTGTCTATTT CGTTCATCCA  
TAGTTGCCTG  
3961 ACTCCCCGTC GTGTAGATAA CTACGATACG GGAGGGCTTA CCATCTGGCC  
CCAGTGCTGC  
4021 AATGATACCG CGAGACCCAC GTCACCGGC TCCAGATTTA TCAGCAATAA  
ACCAGCCAGC  
4081 CGGAAGGGCC GAGCGCAGAA GTGGTCCTGC AACTTTATCC GCCTCCATCC  
AGTCTATTAA  
4141 TTGTTGCCGG GAAGCTAGAG TAAGTAGTTC GCCAGTTAAT AGTTTGCGCA  
ACGTTGTTGC  
4201 CATTGCTACA GGCATCGTGG TGTCACGCTC GTCGTTTGGT ATGGCTTCAT  
TCAGCTCCGG  
4261 TTCCAACGA TCAAGGCGAG TTACATGATC CCCCATGTTG TGCAAAAAAG  
CGGTTAGCTC  
4321 CTTCCGTCCT CCGATCGTTG TCAGAAGTAA GTTGGCCGCA GTGTTATCAC  
TCATGGTTAT  
4381 GGCAGCACTG CATAATTCTC TTAAGTGCAT GCCATCCGTA AGATGCTTTT  
CTGTGACTGG  
4441 TGAGTACTCA ACCAAGTCAT TCTGAGAATA GTGTATGCGG CGACCGAGTT  
GCTCTTGCCC

```
4501 GCGTCAATA CGGGATAATA CCGCGCCACA TAGCAGAACT TAAAAGTGC
TCATCATTGG
4561 AAAACGTTCT TCGGGGCGAA AACTCTCAAG GATCTTACCG CTGTTGAGAT
CCAGTTCGAT
4621 GTAACCCACT CGTGCACCCA ACTGATCTTC AGCATCTTTT ACTTTCACCA
GCGTTTCTGG
4681 GTGAGCAAAA ACAGGAAGGC AAAATGCCGC AAAAAAGGGA ATAAGGGCGA
CACGGAAATG
4741 TTGAATACTC ATACTCTTCC TTTTCAATA TTATTGAAGC ATTTATCAGG
GTTATTGTCT
4801 CATGAGCGGA TACATATTTG AATGTATTTA GAAAAATAAA CAAATAGGGG
TTCCGCGCAC
4861 ATTTCCCGA AAAGTGCCAC
//
```



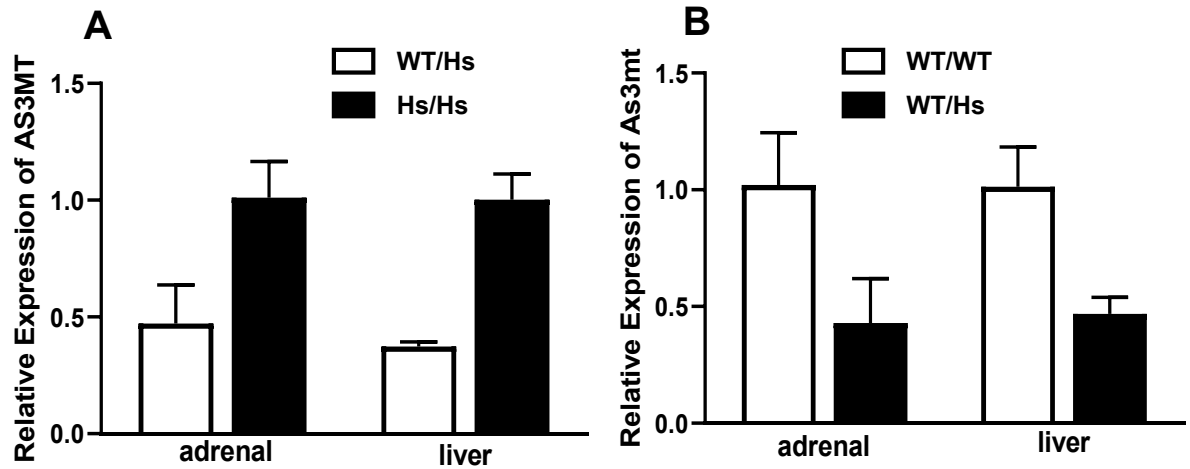

**Figure S1:** Comparison of *AS3MT* and *As3mt* expression levels in adrenals and liver of the humanized (Hs/Hs) and wild type (WT/WT) mice and the WT/Hs heterozygotes: **A.** Relative expression of the human *AS3MT*; **B.** Relative expression of the mouse *As3mt*. 2  $\mu$ g RNA was reverse transcribed and quantitative PCR was run using *AS3MT* (Hs00960526\_q1), *As3mt* (Mm00491075\_m1), and 18S gene expression assays (Applied Biosystems) and qPCRBIO Probe Blue Mix (low ROX, Genesee Scientific). For each tissue, expression level in the mice homozygous for the gene was assigned a value of 1 (Mean +SE, N=6 for adrenals, N=3 for liver).

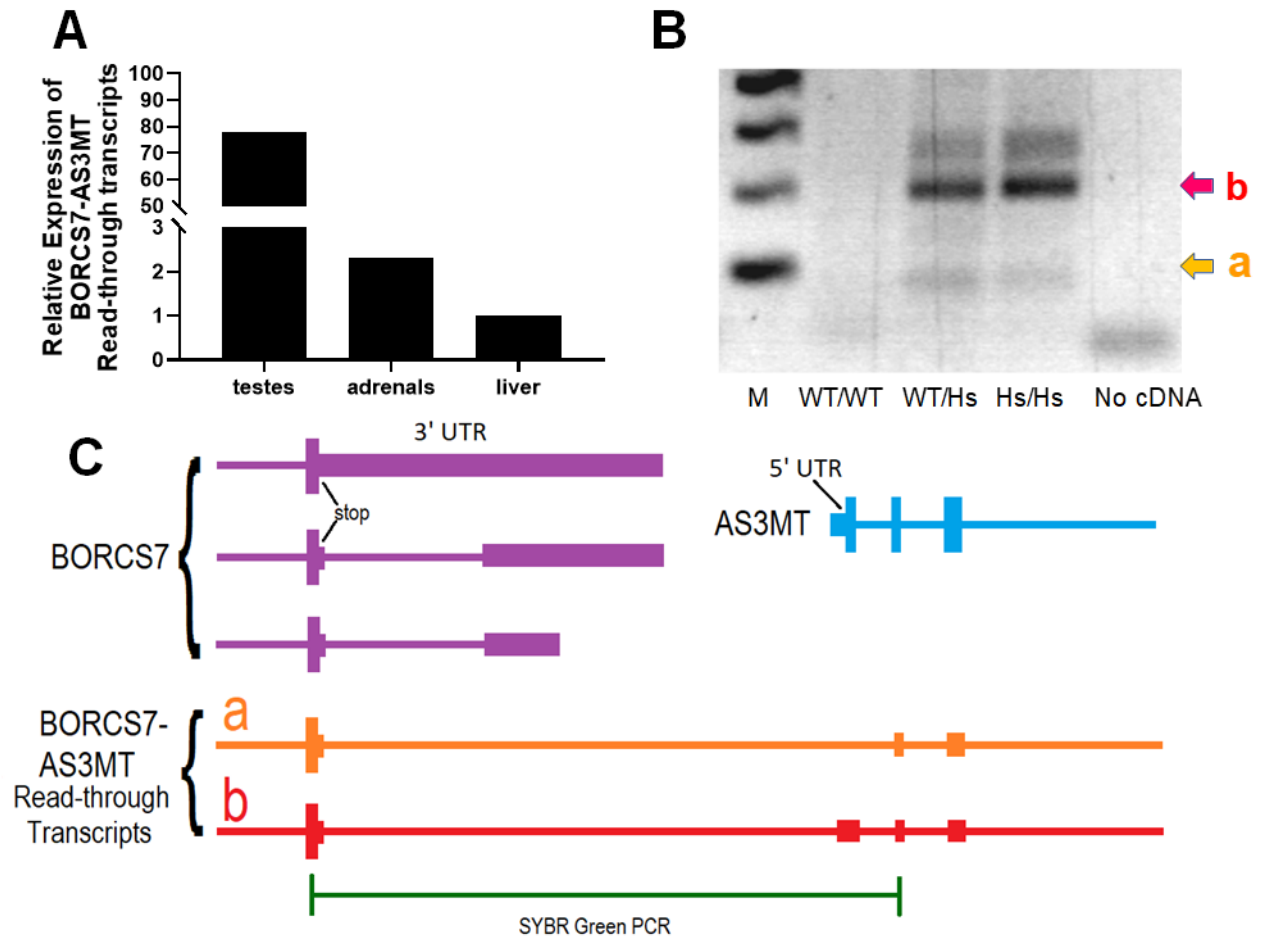

**Figure S2:** Expression of *BORCS7-AS3MT* read-through transcripts in tissues of the humanized (Hs/Hs) and wild type (WT/WT) mice and the WT/Hs heterozygotes. **A.** Read-through transcript expression in testes, adrenal glands, and liver of Hs/Hs mice (N=1/tissue). **B.** Separation of cDNA from testes of WT/WT, WT/Hs and Hs/Hs mice on a 1.6% agarose gel (N=1/genotype): (a) 100 bp fragment, consistent with the previously described read-through transcript; (b) 220 bp fragment of a read-through transcript that has not been previously reported. **C.** Schematic structures of the unspliced *BORCS7* isoforms (lavender), *AS3MT* (blue) and the previously reported (orange) (Lu X et al. 2015) and novel (red) *BORCS7-AS3MT* read-through transcripts. Introns are indicated by thin lines, untranslated exonic sequence by medium lines, and exonic coding sequence by thick lines. The position of the stop codon is indicated for the top two *BORCS7* transcripts. The PCR used for quantification and sequencing of the *BORCS7-AS3MT* junction of the read-through transcripts is indicated at the bottom of the figure (green).

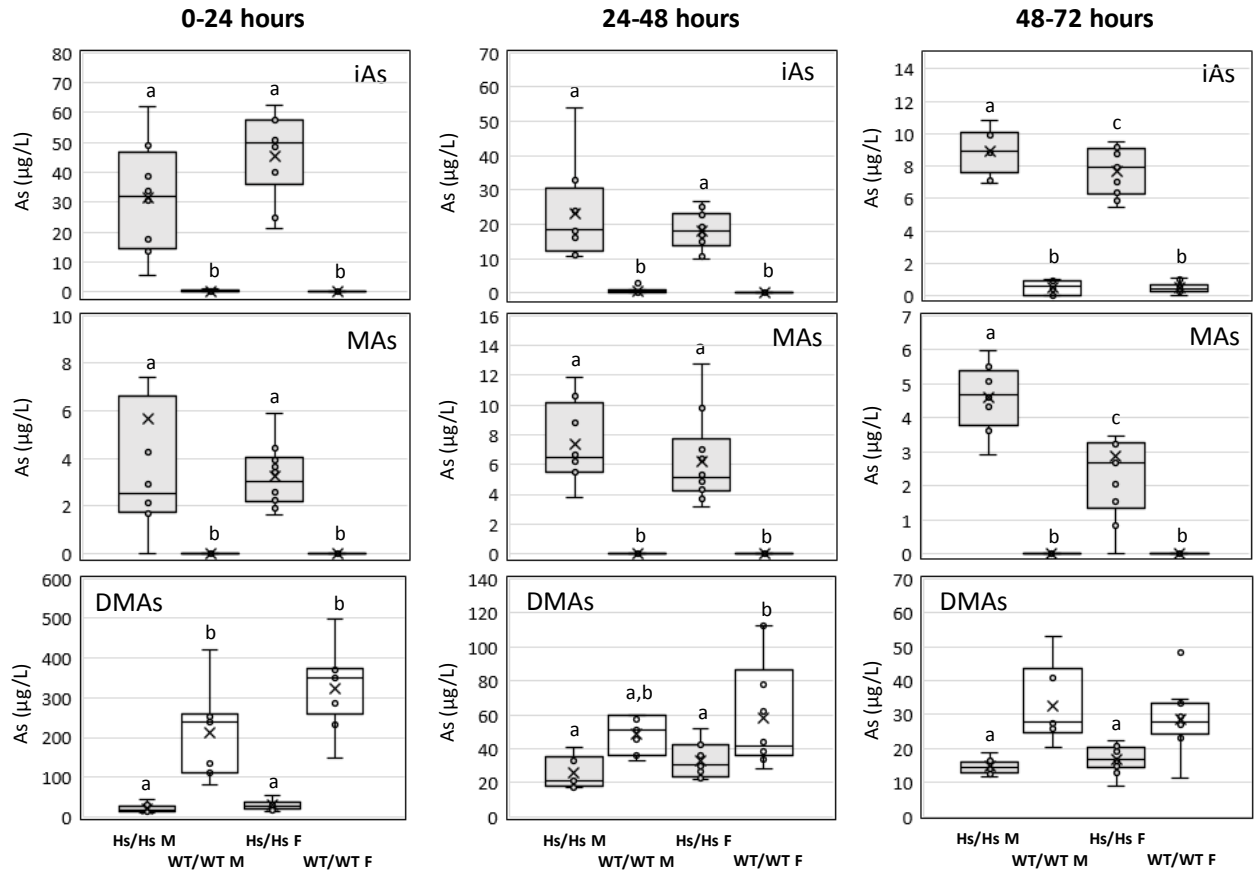

**Figure S3:** Concentrations of inorganic arsenic (iAs), methyl-arsenic (MAs) and dimethyl-arsenic (DMAs) ( $\mu\text{g As/L}$ ) in urine of humanized (Hs/Hs) and wild type (WT/WT) male (M) and female (F) mice collected during 24-h intervals after oral administration of a single dose of iAs ( $20 \mu\text{g As/kg}$  body weight). Mean (x), median (—), 25<sup>th</sup> and 75<sup>th</sup> percentiles (box), maximum and minimum (whiskers), and individual values including outliers are shown (N=8 for Hs/Hs males, N=10 for Hs/Hs females, N=7 for WT/WT males, and N=11 for WT/WT females). MAs concentration was below limit of detection in 52 out of 54 urine samples collected from WT/WT mice during the 3 collection intervals; a value of  $0 \mu\text{g As/L}$  was imputed for MAs concentrations in these samples. <sup>a,b,c</sup> Within each panel, statistically significant differences between strains and sexes are marked with different letters. (ANOVA with Student-Newman-Keuls post-test.)

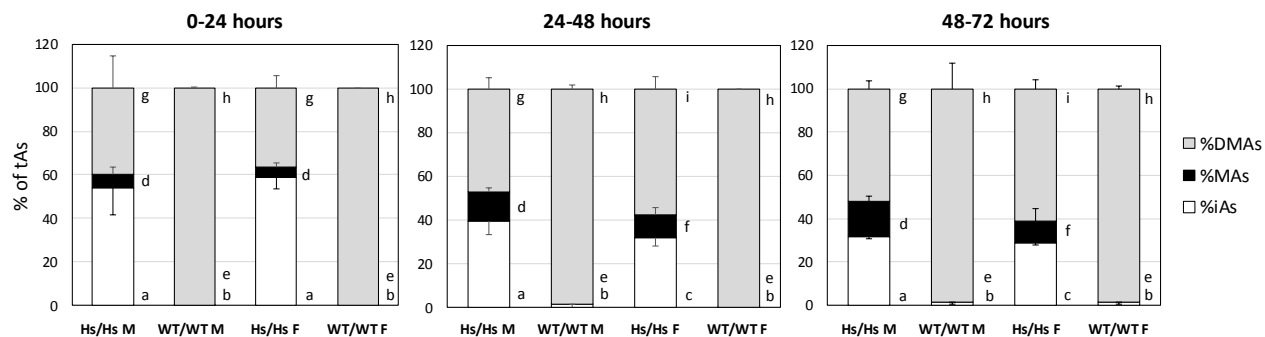

**Figure S4:** Proportions of total arsenic (%tAs) represented by inorganic arsenic (%iAs), methyl-arsenic (%MAs) and dimethyl-arsenic (%DMAs) in urine of humanized (Hs/Hs) and wild type (WT/WT) male (M) and female (F) mice collected during 24-h intervals after oral administration of a single dose of iAs (20 µg As/kg body weight). Mean +SD (N=8 for Hs/Hs males, N=10 for Hs/Hs females, N=7 for WT/WT males, and N=11 for WT/WT females). MAs concentration was below limit of detection in 52 out of 54 urine samples collected from WT/WT mice during the 3 collection intervals; a value of 0 µg As/L was imputed for MAs. Within each panel, statistically significant differences between strains and sexes are marked with different letters: <sup>a,b,c</sup> for differences in %iAs, <sup>d,e,f</sup> for differences in %MAs, <sup>g,hi</sup> for differences in %DMAs. (ANOVA with Student-Newman-Keuls post-test.)

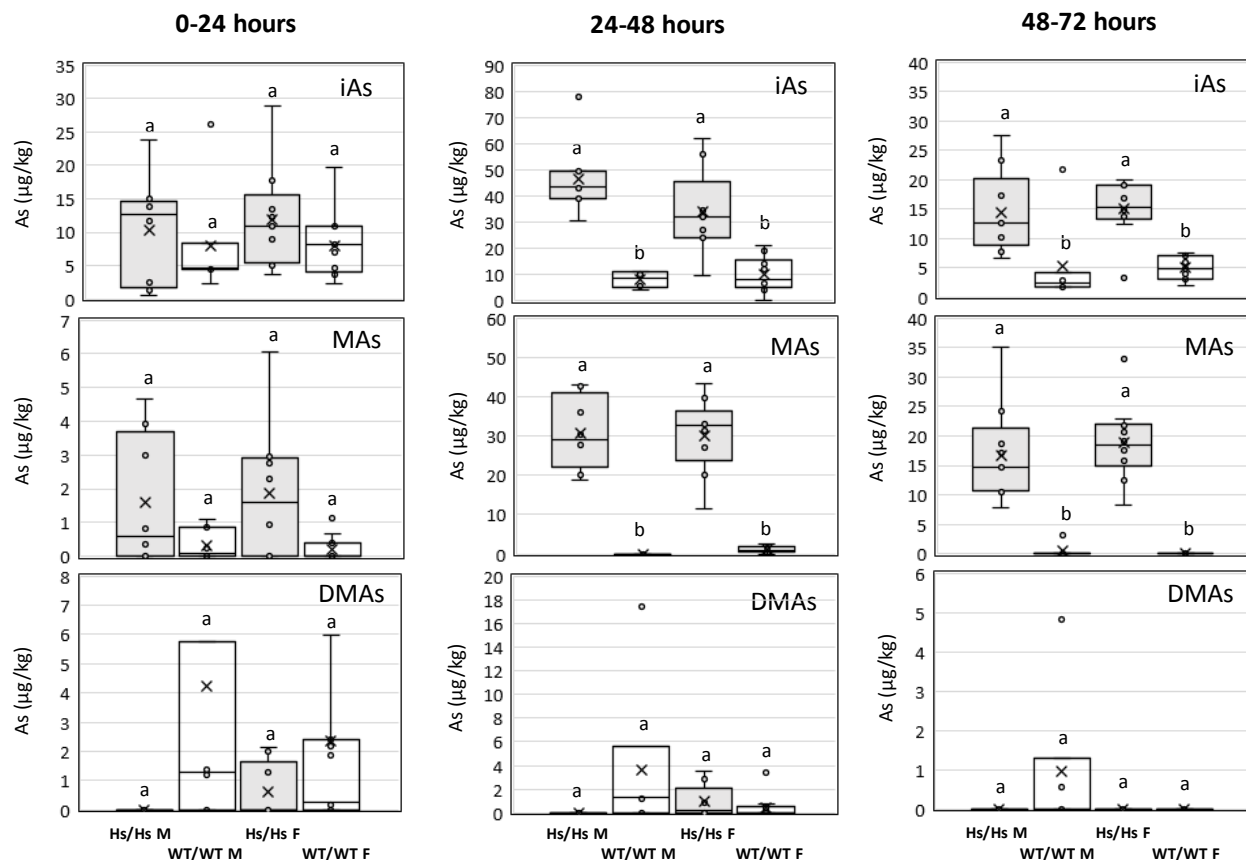

**Figure S5:** Concentrations of inorganic arsenic (iAs), methyl-arsenic (MAs) and dimethyl-arsenic (DMAs) ( $\mu\text{g As/L}$ ) in feces of humanized (Hs/Hs) and wild type (WT/WT) male (M) and female (F) mice collected during 24-h intervals after oral administration of a single dose of iAs ( $20 \mu\text{g As/kg}$  body weight). Mean (x), median (—), 25<sup>th</sup> and 75<sup>th</sup> percentiles (box), maximum and minimum (whiskers), and individual values including outliers are shown (N=8 for Hs/Hs males, N=10 for Hs/Hs females, N=7 for WT/WT males, and N=11 for WT/WT females). DMAs concentration was below limit of detection in 48 out of 54 fecal samples collected during the 3 collection intervals from male and female Hs/Hs mice; a value of  $0 \mu\text{g As/kg}$  was imputed for DMAs concentrations in these samples. <sup>a,b</sup> Within each panel, statistically significant differences between strains and sexes are marked with different letters. (ANOVA with Student-Newman-Keuls post-test.)

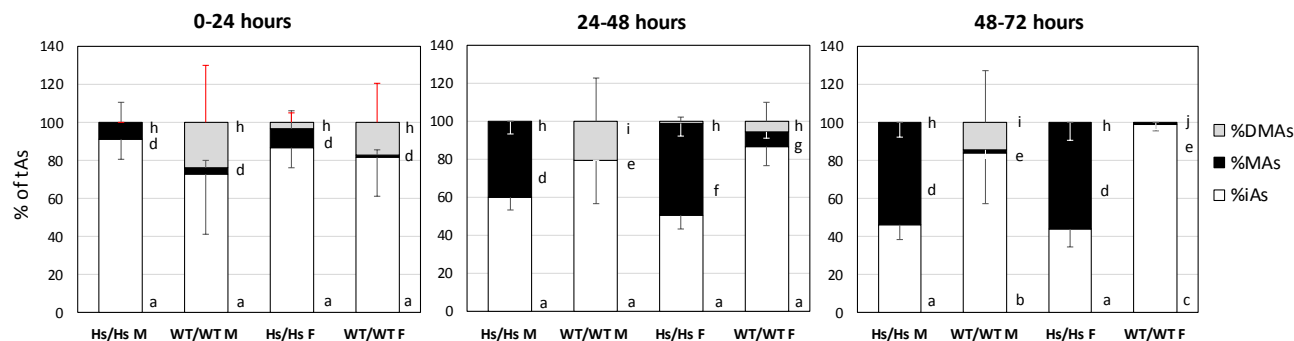

**Figure S6:** Proportions of total arsenic (%tAs) represented by inorganic arsenic (%iAs), methyl-arsenic (%MAs) and dimethyl-arsenic (%DMAs) in feces of humanized (Hs/Hs) and wild type (WT/WT) male (M) and female (F) mice collected during 24-h intervals after oral administration of a single dose of iAs (20 µg As/kg body weight). Mean +SD (N=8 for Hs/Hs males, N=10 for Hs/Hs females, N=7 for WT/WT males, and N=11 for WT/WT females). DMAs concentration was below limit of detection in 48 out of 54 fecal samples collected during the 3 collection intervals from male and female Hs/Hs mice; a value of 0 µg As/kg was imputed for DMAs concentrations in these samples. Within each panel, statistically significant differences between strains and sexes are marked with different letters: <sup>a,b,c</sup> for differences in %iAs, <sup>d,e,f,g</sup> for differences in %MAs, <sup>h,i,j</sup> for differences in %DMAs. (ANOVA with Student-Newman-Keuls post-test.)

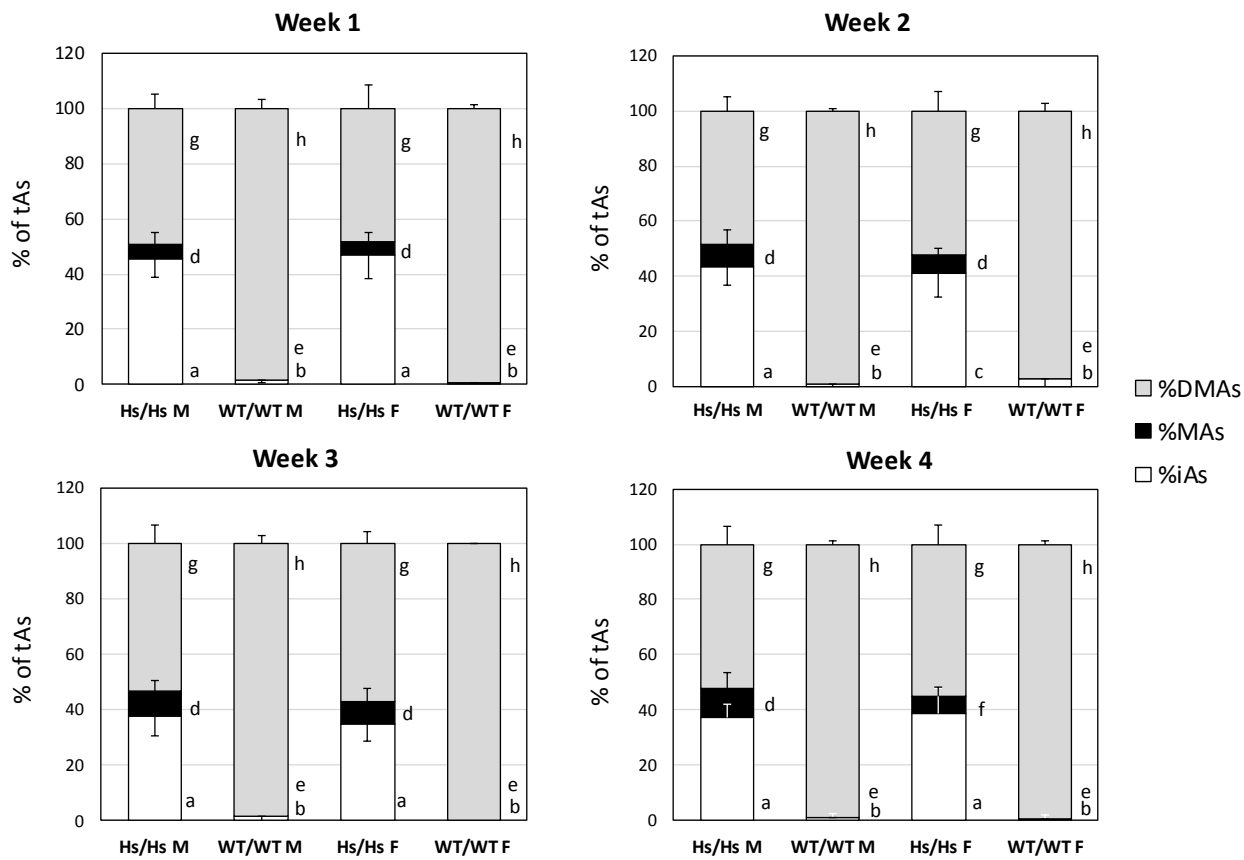

**Figure S7:** Proportions of total arsenic (%tAs) represented by inorganic arsenic (%iAs), methyl-arsenic (%MAs) and dimethyl-arsenic (%DMAs) in urine of humanized (Hs/Hs) and wild type (WT/WT) male (M) and female (F) mice collected during 4-week exposure to iAs in drinking water (400  $\mu\text{g As/L}$ ). Mean +SD (N=8 for Hs/Hs males, N=10 for Hs/Hs females, N=7 for WT/WT males, and N=11 for WT/WT females). MAs concentration was below LOD in 70 out of 72 urine samples collected from WT/WT mice during the 4 collection intervals; a value of 0  $\mu\text{g As/L}$  was imputed for MAs concentrations in these samples. Within each panel, statistically significant differences between strains and sexes are marked with different letters: <sup>a,b,c</sup> %iAs, <sup>d,e,f</sup> %MAs, <sup>g,h</sup> %DMAs. (ANOVA with Student-Newman-Keuls post-test.)

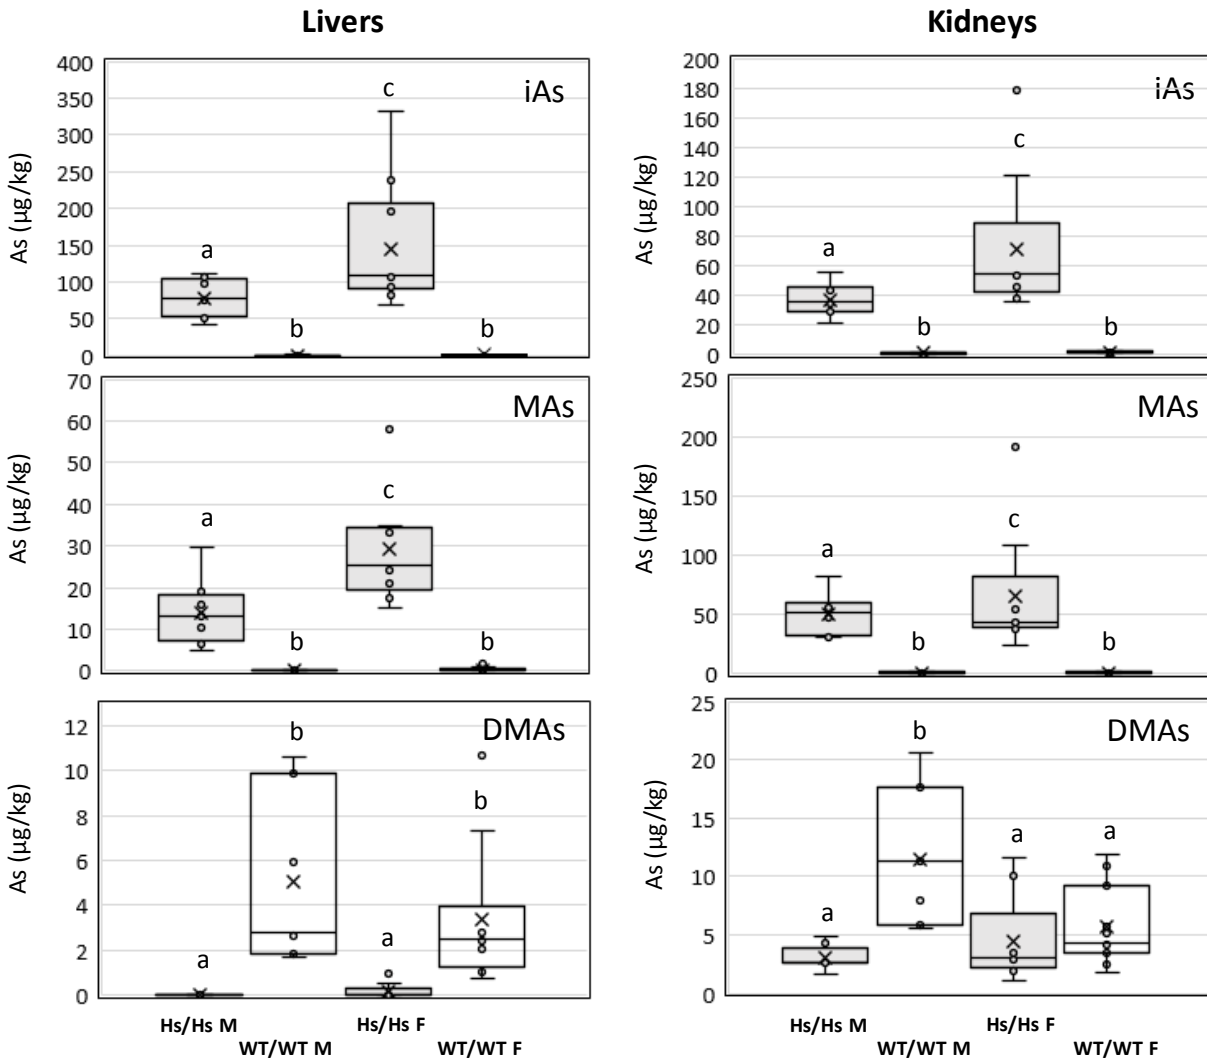

**Figure S8:** Concentrations of total arsenic ( $\mu\text{g As/kg}$ ) in livers and kidneys of humanized (Hs/Hs) and wild type (WT/WT) male (M) and female (F) mice after 4-week exposure to iAs in drinking water ( $400 \mu\text{g As/L}$ ). Total arsenic was calculated as sum of inorganic arsenic, methyl-arsenic and dimethyl-arsenic. Mean (x), median (—), 25<sup>th</sup> and 75<sup>th</sup> percentiles (box), maximum and minimum (whiskers), and individual values including outliers are shown (Mean+SD; N=8 for Hs/Hs males, N=10 for Hs/Hs females, N=7 for WT/WT males, and N=11 for WT/WT females). DMAs was below LOD in 16 out of 18 liver samples collected from Hs/Hs mice; a value of  $0 \mu\text{g As/kg}$  was imputed for DMAs concentrations in these samples. <sup>a,b,c</sup> Within each panel, statistically significant differences between strains and sexes are marked with different letters. (ANOVA with Student-Newman-Keuls post-test.)



## References

Abhyankar LN, Jones MR, Guallar E, Navas-Acien A. 2012. Arsenic exposure and hypertension: a systematic review. *Environ Health Perspect* 120(4):494-500, PMID: 24953689, doi: 10.1289/ehp.1103988.

Ahsan H, Chen Y, Kibriya MG, Slavkovich V, Parvez F, Jasmine F, Gamble MV, Graziano JH. 2007. Arsenic metabolism, genetic susceptibility, and risk of premalignant skin lesions in Bangladesh. *Cancer Epidemiol Biomarkers Prev* 16(6):1270-1278. PMID: 17548696, doi: 10.1158/1055-9965.EPI-06-0676.

Apata M, Arriaza B, Llop E, Moraga M. 2017. Human adaptation to arsenic in Andean populations of the Atacama Desert. *Am J Phys Anthropol*. 163(1):192-199. PMID: 28206677, doi: 10.1002/ajpa.23193.

ATSDR. 2007. Agency for Toxic Substances and Disease Registry. Toxicological profile for arsenic. U.S. DHHS, Public Health Service, Atlanta, GA.

Caito S and Aschner M. 2015. Neurotoxicity of metals. *Handb Clin Neurol* 131:169-189. PMID: 26563789, doi: 10.1016/B978-0-444-62627-1.00011-1.

Chandler KJ, Chandler RL, Broeckelmann EM, Hou Y, Southard-Smith EM, Mortlock DP. 2007. Relevance of BAC transgene copy number in mice: transgene copy number variation across multiple transgenic lines and correlations with transgene integrity and expression. *Mamm Genome* 18(10):693-708. PMID: 17882484, doi: 10.1007/s00335-007-9056-y.

Cheng J, Ma X, Gonzalez FJ. 2011. Pregnane X receptor- and CYP3A4-humanized mouse models and their applications. *Br J Pharmacol* 163(3):461-468. PMID: 21091656, doi: 10.1111/j.1476-5381.2010.01129.x.

Coryell M, McAlpine M, Pinkham NV, McDermott TR, Walk ST. 2018. The gut microbiome is required for full protection against acute arsenic toxicity in mouse models. *Nat Commun*. 9(1):5424. PMID: 30575732, doi: 10.1038/s41467-018-07803-9

Csanaky I and Gregus Z. 2002. Species variations in the biliary and urinary excretion of arsenate, arsenite and their metabolites. *Comp Biochem Physiol C Toxicol Pharmacol* 131(3):355-365. PMID: 11912060, doi: 10.1016/s1532-0456(02)00018-2.

Cubadda F, Jackson BP, Cottingham KL, Van Horne YO, Kurzius-Spencer M. 2017. Human exposure to dietary inorganic arsenic and other arsenic species: State of knowledge, gaps and uncertainties. *Sci Total Environ* 579:1228-1239. PMID: 27914647, doi: 10.1016/j.scitotenv.2016.11.108.

Currier JM, Svoboda M, de Moraes DP, Matousek T, Dědina J, Stýblo M. 2011. Direct analysis of methylated trivalent arsenicals in mouse liver by hydride generation-cryotrapping-atomic absorption spectrometry. *Chem Res Toxicol* 24 (4):478-480. PMID: 21361335, doi: 10.1021/tx200060c.

Ding L, Saunders RJ, Drobná Z, Walton FS, Xun P, Thomas DJ, Stýblo M. 2012. Methylation of arsenic by recombinant human wild-type arsenic (+3 oxidation state) methyltransferase and its methionine 287 threonine (M287T) polymorph: Role of glutathione. *Toxicol Appl Pharmacol* 264(1):121-130. PMID: 22868225, doi: 10.1016/j.taap.2012.07.024.

Douillet C, Huang MC, Saunders RJ, Dover EN, Zhang C, Stýblo M. 2017. Knockout of arsenic (+3 oxidation state) methyltransferase is associated with adverse metabolic phenotype in mice: the role of sex and arsenic exposure. *Arch Tox* 91(7):2617-2627. PMID: 27847981, doi: 10.1007/s00204-016-1890-9.

Drobná Z, Naranmandura H, Kubachka KM, Edwards BC, Herbin-Davis K, Styblo M, Le XC, Creed JT, Maeda N, Hughes MF, Thomas DJ. 2009. Disruption of the arsenic (+3 oxidation state) methyltransferase gene in the mouse alters the phenotype for methylation of arsenic and affects distribution and retention of orally administered arsenate. *Chem Res Toxicol* 22(10):1713-1720. PMID: 19691357, doi: 10.1021/tx900179r.

Duarte RRR, Troakes C, Nolan M, Srivastava DP, Murray RM, Bray NJ. 2016. Genome-wide significant schizophrenia risk variation on chromosome 10q24 is associated with altered cis-regulation of BORCS7, AS3MT, and NT5C2 in the human brain. *Am J Med Genet B Neuropsychiatr Genet* 171(6):806-814. PMID: 27004590, doi: 10.1002/ajmg.b.32445.

El-Masri HA and Kenyon EM. 2008. Development of a human physiologically based pharmacokinetic (PBPK) model for inorganic arsenic and its mono- and di-methylated metabolites. *J Pharmacokinet Pharmacodyn* 35(1):31-68. PMID: 17943421, doi: 10.1007/s10928-007-9075-z.

Hernández-Zavala A, Matoušek T, Drobná Z, Paul DS, Walton F, Adair BM, Jiří D, Thomas DJ, Stýblo M. 2008. Speciation of arsenic in biological matrices by automated hydride generation-cryotrapping-atomic absorption spectrometry with multiple microflame quartz tube atomizer (multiatomizer). *J Anal At Spectrom* 23:342-351. PMID: 18677417, doi: 10.1039/b706144g

Huang MC, Douillet C, Dover EN, Stýblo M. 2018. Prenatal arsenic exposure and dietary folate and methylcobalamin supplementation alter the metabolic phenotype of C57BL/6J mice in a sex-specific manner. *Arch Tox* 92(6):1925-1937. PMID: 29721587, doi: 10.1007/s00204-018-2206-z.

Hudgens EE, Drobná Z, He B, Le XC, Styblo M, Rogers J, Thomas DJ. 2016. Biological and behavioral factors modify urinary arsenic metabolic profiles in a U.S. population. *Environ Health*. 15(1):62. PMID: 27230915; doi: 10.1186/s12940-016-0144-x.

Hughes MF, Edwards BC, Herbin-Davis KM, Saunders J, Styblo M, Thomas DJ. 2010. Arsenic (+3 oxidation state) methyltransferase genotype affects steady-state distribution and clearance of arsenic in arsenate-treated mice. *Toxicol Appl Pharmacol* 249(3):217-223. PMID: 20887743, doi: 10.1016/j.taap.2010.09.017.

IARC. 2004. International Agency for Research on Cancer. Arsenic in drinking water. IARC Press, Lyon, vol.84, pp. 269-477.

Koller BH, Hagemann LJ, Doetschman T, Hagaman JR, Huang S, Williams PJ, First NL, Maeda N, Smithies O. 1989. Germ-line transmission of a planned alteration made in a hypoxanthine phosphoribosyltransferase gene by homologous recombination in embryonic stem cells. *Proc Natl Acad Sci USA* 86(22):8927–8931. PMID: 2573070, doi: 10.1073/pnas.86.22.8927.

Li M, Jaffe AE, Straub RE, Tao R, Shin JH, Wang Y, Chen Q, Li C, Jia Y, Ohi K, Maher BJ, Brandon NJ, Cross A, Chenoweth JG, Hoepfner DJ, Wei H, Hyde TM, McKay R, Kleinman JE, Weinberger DR. 2016. A human-specific AS3MT isoform and BORCS7 are molecular risk factors in the 10q24.32 schizophrenia-associated locus. *Nat Med* 22(6):649-656. PMID: 27158905, doi: 10.1038/nm.4096.

Lin S, Shi Q, Nix FB, Styblo M, Beck MA, Herbin-Davis KM, Hall LL, Simeonsson JB, Thomas DJ. 2002. A novel S-adenosyl-L-methionine:arsenic(III) methyltransferase from rat liver cytosol. *J Biol Chem* 277(13):10795-10803. PMID: 11790780, doi: 10.1074/jbc.M110246200.

Lindberg AL, Ekström EC, Nermell B, Rahman M, Lönnerdal B, Persson LA, Vahter M. 2007a. Gender and age differences in the metabolism of inorganic arsenic in a highly exposed population in Bangladesh. *Environ Res* 106(1):110-120. PMID: 17900557, doi: 10.1016/j.envres.2007.08.011.

Lindberg AL, Kumar R, Goessler W, Thirumaran R, Gurzau E, Koppova K, Rudnai P, Leonardi G, Fletcher T, Vahter M. 2007b. Metabolism of low-dose inorganic arsenic in a central European population: influence of sex and genetic polymorphisms. *Environ Health Perspect* 115(7):1081-1086. PMID: 17637926, doi: 10.1289/ehp.10026.

Lindberg AL, Rahman M, Persson LA, Vahter M. 2008. The risk of arsenic induced skin lesions in Bangladeshi men and women is affected by arsenic metabolism and the age at first exposure. *Toxicol Appl Pharmacol* 230(1):9-16. PMID: 18336856, doi: 10.1016/j.taap.2008.02.001.

Longenecker G and Kulkarni AB. 2009. Generation of gene knockout mice by ES cell microinjection. *Curr Protoc Cell Biol*. CHAPTER: Unit–19.1436. PMID: 19731226, doi: 10.1002/0471143030.cb1914s44

Lu M, Wang H, Li XF, Arnold LL, Cohen SM, Le XC. 2007. Binding of dimethylarsinous acid to cys-13alpha of rat hemoglobin is responsible for the retention of arsenic in rat blood. *Chem Res Toxicol* 20(1):27-37. PMID: 17226924, doi: 10.1021/tx060195+.

Lu K, Mahbub R, Cable PH, Ru H, Parry NM, Bodnar WM, Wishnok JS, Styblo M, Swenberg JA, Fox JG, Tannenbaum SR. 2014a. Gut microbiome phenotypes driven by host genetics affect arsenic metabolism. *Chem Res Toxicol*. 27(2):172-174. PMID: 24490651, doi: 10.1021/tx400454z.

Lu K, Abo RP, Schlieper KA, Graffam ME, Levine S, Wishnok JS, Swenberg JA, Tannenbaum SR, Fox JG. 2014b. Arsenic exposure perturbs the gut microbiome and its metabolic profile in mice: an integrated metagenomics and metabolomics analysis. *Environ Health Perspect*. 122(3):284-291. PMID: 24413286, doi: 10.1289/ehp.1307429.

Lu X, Wang L, Lin X, Huang J, Charles Gu C, He M, Shen H, He J, Zhu J, Li H, Hixson JE, Wu T, Dai J, Lu L, Shen C, Chen S, He L, Mo Z, Hao Y, Mo X, Yang X, Li J, Cao J, Chen J, Fan Z, Li Y, Zhao L, Li H, Lu F, Yao C, Yu L, Xu L, Mu J, Wu X, Deng Y, Hu D, Zhang W, Ji X, Guo D, Guo Z, Zhou Z, Yang Z, Wang R, Yang J, Zhou X, Yan W, Sun N, Gao P, Gu D. 2015. Genome-wide association study in Chinese identifies novel loci for blood pressure and hypertension. *Hum Mol Genet.* 24(3):865-874. PMID: 25249183, doi: 10.1093/hmg/ddu478.

Mauil EA, Ahsan H, Edwards J, Longnecker MP, Navas-Acien A, Pi J, Silbergeld EK, Styblo M, Tseng CH, Thayer KA, Loomis D. 2012. Evaluation of the association between arsenic and diabetes: a national toxicology program workshop report. *Environ Health Perspect* 120(12):1658-1670. PMID: 22889723, doi: 10.1289/ehp.1104579.

Mazumder DN. 2005. Effect of chronic intake of arsenic-contaminated water on liver. *Toxicol Appl Pharmacol* 206(2):169-175. PMID: 15967205, doi: 10.1016/j.taap.2004.08.025.

Moon K, Guallar E, Navas-Acien A. 2012. Arsenic exposure and cardiovascular disease: an updated systematic review. *Curr Atheroscler Rep* 14(6):542-555. PMID: 22968315, doi: 10.1007/s11883-012-0280-x.

Mukai HY, Motohashi H, Ohneda O, Suzuki N, Nagano M, Yamamoto M. 2006. Transgene insertion in proximity to the c-myb gene disrupts erythroid-megakaryocytic lineage bifurcation. *Mol Cell Biol* 26(21):7953-7965. PMID: 16940183, doi: 10.1128/MCB.00718-06.

Murko M, Elek B, Styblo M, Thomas DJ, Francesconi KA. 2018. Dose and Diet – Sources of arsenic intake in mouse in utero exposure scenarios. *Chem Res Toxicol* 31(2):156-164. PMID: 29244955, doi: 10.1021/acs.chemrestox.7b00309.

Naujokas MF, Anderson B, Ahsan H, Aposhian HV, Graziano JH, Thompson C, Suk WA. 2013. The broad scope of health effects from chronic arsenic exposure: update on a worldwide public health problem. *Environ Health Perspect* 121(3):295-302. PMID: 23458756, doi: 10.1289/ehp.1205875.

Padmanabhan P1, Grosse J, Asad AB, Radda GK, Golay X. 2013. Gastrointestinal transit measurements in mice with <sup>99m</sup>Tc-DTPA-labeled activated charcoal using NanoSPECT-CT. *EJNMMI Res.* 3(1):60. PMID: 23915679, doi: 10.1186/2191-219X-3-60.

Parvez F, Wasserman GA, Factor-Litvak P, Liu X, Slavkovich V, Siddique AB, Sultana R, Sultana R, Islam T, Levy D, Mey JL, van Geen A, Khan K, Kline J, Ahsan H, Graziano JH. 2011. Arsenic exposure and motor function among children in Bangladesh *Environ Health Perspect* 119(11):1665-1670. PMID: 21742576, doi: 10.1289/ehp.1103548.

Paul DS, Walton FS, Saunders RJ, Stýblo M. 2011. Characterization of the impaired glucose homeostasis produced in C57BL/6 mice by chronic exposure to arsenic and high-fat diet. *Environ Health Perspect* 119(8):1104–1109. PMID: 21592922, doi: 10.1289/ehp.1003324.

Paul DS, Hernández-Zavala A, Walton FS, Adair BM, Dedina J, Matousek T, Stýblo M. 2007. Examination of the effects of arsenic on glucose homeostasis in cell culture and animal studies:

development of a mouse model for arsenic-induced diabetes. *Toxicol Appl Pharmacol* 222(3):305-314. PMID: 17336358, doi: 10.1016/j.taap.2007.01.010.

Pierce BL, Kibriya MG, Tong L, Jasmine F, Argos M, Roy S, Paul-Brutus R, Rahaman R, Rakibuz-Zaman M, Parvez F, Ahmed A, Quasem I, Hore SK, Alam S, Islam T, Slavkovich V, Gamble MV, Yunus M, Rahman M, Baron JA, Graziano JH, Ahsan H. 2012. Genome-wide association study identifies chromosome 10q24.32 variants associated with arsenic metabolism and toxicity phenotypes in Bangladesh. *PLoS Genet.* 8(2):e1002522. PMID: 22383894, doi: 10.1371/journal.pgen.1002522.

Pierce BL, Tong L, Argos M, Gao J, Farzana J, Roy S, Paul-Brutus R, Rahaman R, Rakibuz-Zaman M, Parvez F, Ahmed A, Quasem I, Hore SK, Alam S, Islam T, Harjes J, Sarwar G, Slavkovich V, Gamble MV, Chen Y, Yunus M, Rahman M, Baron JA, Graziano JH, Ahsan H. 2013. Arsenic metabolism efficiency has a causal role in arsenic toxicity: Mendelian randomization and gene-environment interaction. *Int J Epidemiol* 42(6):1862-1871. PMID: 24536095, doi: 10.1093/ije/dyt182.

Prakash T, Sharma VK, Adati N, Ozawa R, Kumar N, Nishida Y, Fujikake T, Takeda T, Taylor TD. 2010. Expression of conjoined genes: another mechanism for gene regulation in eukaryotes. *PLoS One.* 2010 Oct 12;5(10):e13284. PMID: 20967262, doi: 10.1371/journal.pone.0013284.

Pu J, Schindler C, Jia R, Jarnik M, Backlund P, Bonifacino JS. 2015. BORC, a multisubunit complex that regulates lysosome positioning. *Dev Cell* 33(2):176-188. PMID: 25898167, doi: 10.1016/j.devcel.2015.02.011.

Quan P-L, Sauzade M, Brouzes E. 2018. dPCR: A Technology Review. *Sensors (Basel)* 18(4): 1271. PMID: 29677144, doi: 10.3390/s18041271.

Ripke S, O'Dushlaine C, Chambert K, Moran JL, Kähler AK, Akterin S, Bergen SE, Collins AL, Crowley JJ, Fromer M, Kim Y, Lee SH, Magnusson PK, Sanchez N, Stahl EA, Williams S, Wray NR, Xia K, Bettella F, Borglum AD, Bulik-Sullivan BK, Cormican P, Craddock N, de Leeuw C, Durmishi N, Gill M, Golimbet V, Hamshere ML, Holmans P, Hougaard DM, Kendler KS, Lin K, Morris DW, Mors O, Mortensen PB, Neale BM, O'Neill FA, Owen MJ, Milovancevic MP, Posthuma D, Powell J, Richards AL, Riley BP, Ruderfer D, Rujescu D, Sigurdsson E, Silagadze T, Smit AB, Stefansson H, Steinberg S, Suvisaari J, Tosato S, Verhage M, Walters JT; Multicenter Genetic Studies of Schizophrenia Consortium, Levinson DF, Gejman PV, Kendler KS, Laurent C, Mowry BJ, O'Donovan MC, Owen MJ, Pulver AE, Riley BP, Schwab SG, Wildenauer DB, Dudbridge F, Holmans P, Shi J, Albus M, Alexander M, Campion D, Cohen D, Dikeos D, Duan J, Eichhammer P, Godard S, Hansen M, Lerer FB, Liang KY, Maier W, Mallet J, Nertney DA, Nestadt G, Norton N, O'Neill FA, Papadimitriou GN, Ribble R, Sanders AR, Silverman JM, Walsh D, Williams NM, Wormley B; Psychosis Endophenotypes International Consortium, Arranz MJ, Bakker S, Bender S, Bramon E, Collier D, Crespo-Facorro B, Hall J, Iyegbe C, Jablensky A, Kahn RS, Kalaydjieva L, Lawrie S, Lewis CM, Lin K, Linszen DH, Mata I, McIntosh A, Murray RM, Ophoff RA, Powell J, Rujescu D, Van Os J, Walshe M, Weisbrod M, Wiersma D; Wellcome Trust Case Control Consortium 2, Donnelly P, Barroso I, Blackwell JM, Bramon E, Brown MA, Casas JP, Corvin AP, Deloukas P, Duncanson A,

Jankowski J, Markus HS, Mathew CG, Palmer CN, Plomin R, Rautanen A, Sawcer SJ, Trembath RC, Viswanathan AC, Wood NW, Spencer CC, Band G, Bellenguez C, Freeman C, Hellenthal G, Giannoulatou E, Pirinen M, Pearson RD, Strange A, Su Z, Vukcevic D, Donnelly P, Langford C, Hunt SE, Edkins S, Gwilliam R, Blackburn H, Bumpstead SJ, Dronov S, Gillman M, Gray E, Hammond N, Jayakumar A, McCann OT, Liddle J, Potter SC, Ravindrarajah R, Ricketts M, Tashakkori-Ghanbaria A, Waller MJ, Weston P, Widaa S, Whittaker P, Barroso I, Deloukas P, Mathew CG, Blackwell JM, Brown MA, Corvin AP, McCarthy MI, Spencer CC, Bramon E, Corvin AP, O'Donovan MC, Stefansson K, Scolnick E, Purcell S, McCarroll SA, Sklar P, Hultman CM, Sullivan PF. 2013. Genome-wide association analysis identifies 13 new risk loci for schizophrenia. *Nat Genet.* 45(10):1150-1159. PMID: 23974872, doi: 10.1038/ng.2742.

Sanchez TR, Perzanowski M, Graziano JH. 2016. Inorganic arsenic and respiratory health, from early life exposure to sex-specific effects: A systematic review. *Environ Res* 147:537-555. PMID: 26891939, doi: 10.1016/j.envres.2016.02.009.

Saquib N, Saquib J, Ahmed T, Khanam MA, Cullen MR. 2012. Cardiovascular diseases and type 2 diabetes in Bangladesh: a systematic review and meta-analysis of studies between 1995 and 2010. *BMC Public Health* 12:434. PMID: 22694854, doi: 10.1186/1471-2458-12-434.

Schizophrenia Working Group of the Psychiatric Genomics Consortium. 2014. Biological insights from 108 schizophrenia-associated genetic loci. *Nature.* 511(7510):421-427. PMID: 25056061, doi: 10.1038/nature13595.

States JC, Srivastava S, Chen Y, Barchowsky A. 2009. Arsenic and cardiovascular disease. *Toxicol Sci* 107(2):312-323. PMID: 19015167, doi: 10.1093/toxsci/kfn236.

Stýblo M, Douillet C, Bangma J, Eaves LA, de Villena FP, Fry R. 2019. Differential metabolism of inorganic arsenic in mice from genetically diverse Collaborative Cross strains. *Arch Toxicol* 93(10):2811-2822. PMID: 31493028, doi: 10.1007/s00204-019-02559-7.

The Human Protein Atlas, The adrenal gland-specific proteome.  
<https://www.proteinatlas.org/humanproteome/tissue/adrenal+gland>).

Thomas DJ, Li J, Waters SB, Xing W, Adair BM, Drobna Z, Devesa V, Styblo M. 2007. Arsenic (+3 oxidation state) methyltransferase and the methylation of arsenicals. *Exp Biol Med* (Maywood) 232(1):3-13. PMID: 17202581.

Thomas DJ, Styblo M, Lin S. 2001. The cellular metabolism and systemic toxicity of arsenic. *Toxicol Appl Pharmacol* 176(2):127-144. PMID: 11601889, doi: 10.1006/taap.2001.9258.

UCSC 2013. Genome Browser Gateway, University of California Santa Cruz, Genomics Institute, [https://genome.ucsc.edu/cgi-bin/hgGateway?hgsid=834004679\\_0TKSQmfCdDYnn1sBDBgvD88GKaDR](https://genome.ucsc.edu/cgi-bin/hgGateway?hgsid=834004679_0TKSQmfCdDYnn1sBDBgvD88GKaDR)

Vahter M and Concha G. 2001. Role of metabolism in arsenic toxicity. *Pharmacol Toxicol.* 89(1):1-5. PMID: 11484904, doi: 10.1034/j.1600-0773.2001.d01-128.x.

Vahter M. 2000. Genetic polymorphism in the biotransformation of inorganic arsenic and its role in toxicity. *Toxicol Lett* 112-113:209-217. PMID: doi: 10.1016/s0378-4274(99)00271-4.

Vahter M. 1999. Methylation of inorganic arsenic in different mammalian species and population groups. *Sci Prog* 82 (Pt 1):69-88. PMID: 10445007, doi: 10.1177/003685049908200104.

Watanabe T and Hirano S. 2013. Metabolism of arsenic and its toxicological relevance. *Arch Toxicol* 87(6):969-979. PMID: 22811022, doi: 10.1007/s00204-012-0904-5.

Waters SB, Devesa V, Fricke MW, Creed JT, Stýblo M, Thomas DJ. 2004. Glutathione modulates recombinant rat arsenic (+3 oxidation state) methyltransferase-catalyzed formation of trimethylarsine oxide and trimethylarsine. *Chem Res Toxicol*. 17(12):1621-1629. PMID: 15606138.

Wood TC, Salavagionne OE, Mukherjee B, Wang L, Klumpp AF, Thomae BA, Eckloff BW, Schaid DJ, Wieben ED, Weinshilboum RM. 2006. Human arsenic methyltransferase (AS3MT) pharmacogenetics: gene resequencing and functional genomics studies. *J Biol Chem* 281(11):7364-7373. PMID: 16407288, doi: 10.1074/jbc.M512227200.

Yueh MF, Mellon PL, Tukey RH. 2011. Inhibition of human UGT2B7 gene expression in transgenic mice by the constitutive androstane receptor. *Mol Pharmacol* 79(6):1053-1060. PMID: 21415305, doi: 10.1124/mol.110.070649.
